# Supplementary material for: High expression of XPA confers poor prognosis for nasopharyngeal carcinoma patients treated with platinum-based chemoradiotherapy
Source: PubMed Central journal article supplement (PMC4695073; doi:10.18632/oncotarget.4424), 2015-06-10
Supplement: oncotarget-06-28478-s001.pdf [file oncotarget-06-28478-s001.pdf]

## High expression of XPA confers poor prognosis for nasopharyngeal carcinoma patients treated with platinum-based chemoradiotherapy

### Supplementary Material

**Table S1: Univariate Cox regression analysis**

| Variable                                                       | OS               |                | PFS              |                |
|----------------------------------------------------------------|------------------|----------------|------------------|----------------|
|                                                                | HR (95%CI)       | <i>p</i> value | HR (95%CI)       | <i>p</i> value |
| Gender (Male vs. Female)                                       | /                | 0.769          | /                | 0.614          |
| Age (>50 vs. ≤50)                                              | /                | 0.650          | /                | 0.647          |
| T classification (T <sub>3-4</sub> vs. T <sub>1-2</sub> )      | 2.54 (1.08-5.98) | <b>0.027</b>   | /                | <b>0.058</b>   |
| N classification (N <sub>2-3</sub> vs. N <sub>0-1</sub> )      | /                | 0.428          | /                | <b>0.213</b>   |
| EBV VCA/IgA (>1:160 vs. ≤1:160)                                | /                | 0.705          | /                | 0.485          |
| EBV EA/IgA (>1:20 vs. ≤1:20)                                   | /                | 0.446          | /                | 0.735          |
| Treatment strategy (CCRT <sup>a</sup> vs. IC+RT <sup>b</sup> ) | /                | 0.090          | /                | 0.254          |
| XPA expression (High vs. Low)                                  | 2.44 (1.30-4.60) | <b>0.004</b>   | 1.97 (1.08-3.61) | <b>0.025</b>   |

Note: a. IC+RT, induction chemotherapy plus radiotherapy. b. CCRT, including concurrent chemoradiotherapy only or plus induction chemotherapy.

**Table S2: Primer, siRNAs sequence.**

| Targets                                | Name    | Direction                        | Sequences                        |
|----------------------------------------|---------|----------------------------------|----------------------------------|
| <b>Small interfering RNAs (siRNAs)</b> |         |                                  |                                  |
| XPA                                    | XPA-si1 | Sense                            | 5'-r(ACACAAGCUUAUAACCAAA)dTdT-3' |
|                                        |         | Antisense                        | 5'-r(UUUGGUUAUAAGCUUGUGU)dTdT-3' |
|                                        | XPA-si2 | Sense                            | 5'-r(GUCAAGAAGCAUUAGAAGA)dTdT-3' |
|                                        |         | Antisense                        | 5'-r(UCUUCUAAUGCUUCUUGAC)dTdT-3' |
| Scramble                               | NC-si   | Sense                            | 5'-r(UUCUCCGAACGUGUCACGU)dTdT-3' |
|                                        |         | Antisense                        | 5'-r(ACGUGACACGUUCGGAGAA)dTdT-3' |
| <b>Primers for Quantitative PCR</b>    |         |                                  |                                  |
| XPA                                    | Forward | 5'- TCCACATCATTCAATGGG -3'       |                                  |
|                                        | Reverse | 5'- TGTCGGACTTCCTTTGCTTC -3'     |                                  |
| ACTB                                   | Forward | 5'- TGGCACCCAGCACAATGAA-3'       |                                  |
|                                        | Reverse | 5'- CTAAGTCATAGTCCGCCTAGAAGCA-3' |                                  |

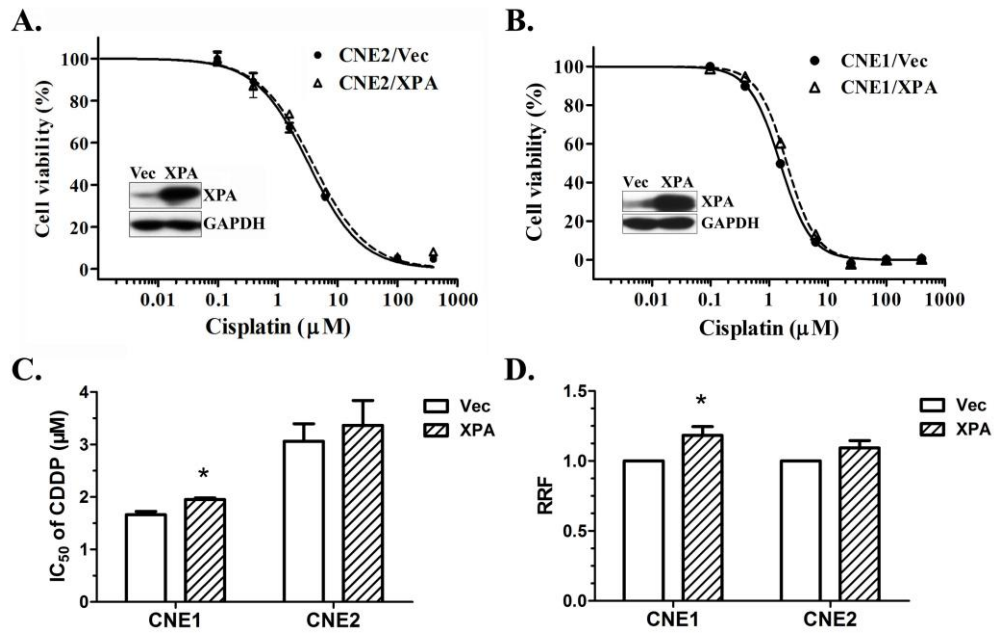

**Figure S1: The effects of overexpressing XPA to cisplatin resistance in NPC cell lines.**  $\text{IC}_{50}$  values of cisplatin were measured by MTT assay after overexpressing XPA in NPC cell line CNE2 and CNE1 cells by transient transfection of plasmids for 24 h. **A**, **B**: Representative dose-dependent cell viability curves in CNE2 (**A**) and CNE1 (**B**) cells (inner, Western blotting for XPA expression). **C**: Average  $\text{IC}_{50}$  values of cisplatin. **D**: The relative resistance factor (RRF). The data shown are from 4 independent experiments (\*,  $P < 0.05$  compared with control).

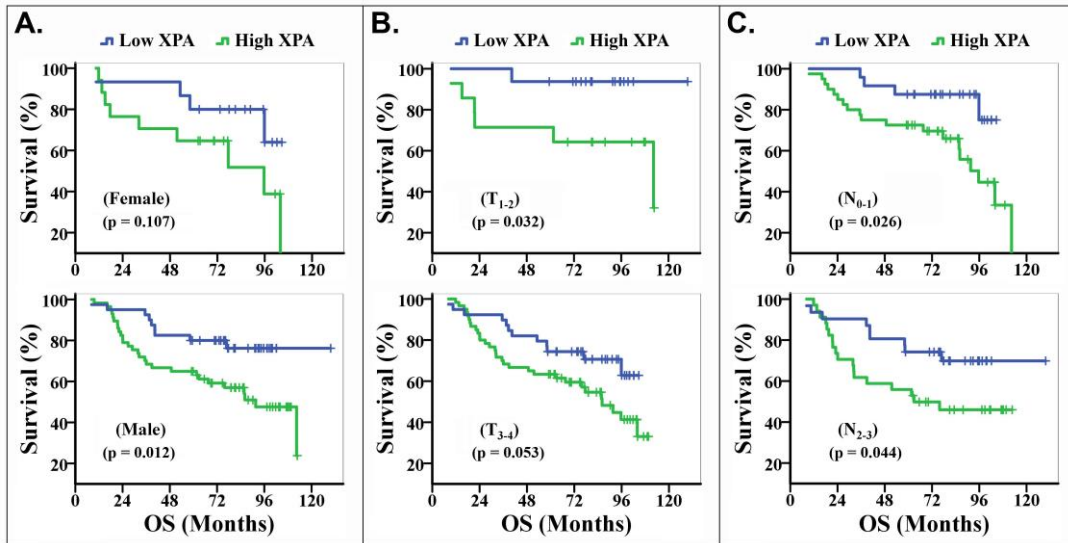

**Figure S2: Stratified analysis for overall survival (OS).** Subgroup OS analysis was performed after stratified by gender (A), T (B) and N classifications (C). A: OS curves for female or male group. B: OS curves for patients at  $T_{1-2}$  or  $T_{3-4}$  stage. C: OS curves for patients at  $N_{0-1}$  or  $N_{2-3}$  stage.  $p < 0.05$  indicates statistical significance.

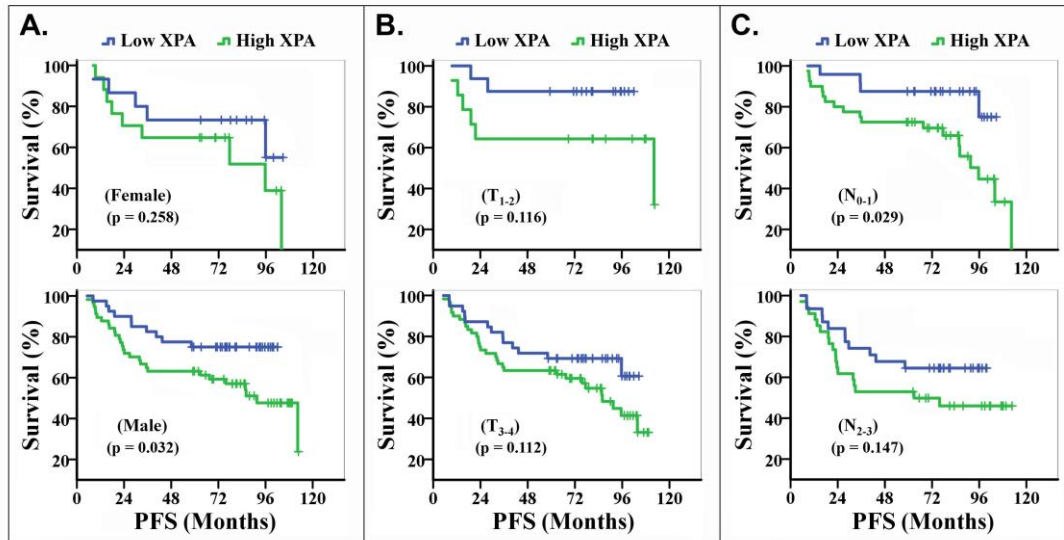

**Figure S3: Stratified analysis for progression-free survival (PFS).** Subgroup PFS analysis was performed after stratified by gender (A), T (B) and N classifications (C). A: PFS curves for female or male group. B: PFS curves for patients at T<sub>1-2</sub> or T<sub>3-4</sub> stage. C: PFS curves for patients at N<sub>0-1</sub> or N<sub>2-3</sub> stage.  $p < 0.05$  indicates statistical significance.

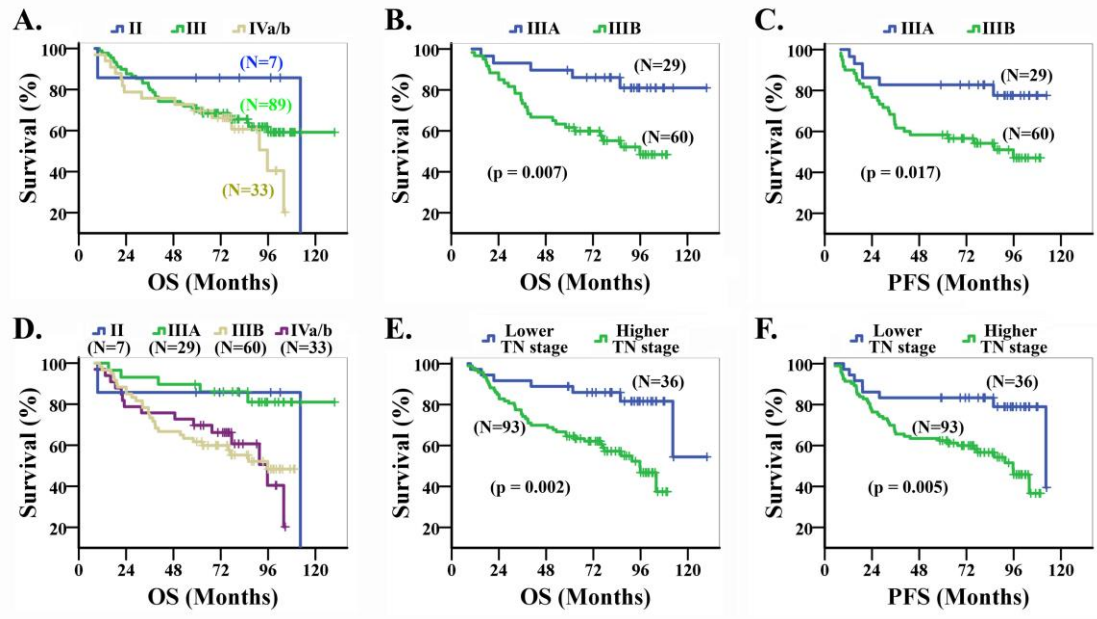

**Figure S4: Kaplan-Meier analysis and log-rank test for overall survival (OS) or progression-free survival (PFS).** **A:** OS curves for patients at stage II, III or IVa/b. **B, C:** OS and PFS curves for patients at stage IIIA ( $T_{1-2}N_2M_0$  or  $T_3N_0M_0$ ) or IIIB ( $T_3N_{1-2}M_0$ ). **D:** OS curves for patients at stage II, IIIA, IIIB or IVa/b. **E, F:** OS and PFS curves for patients with lower TN stage (II, IIIA) or higher TN stage (IIIB or IVa/b).
